# Supplementary material for: Optimization of trans-Splicing for Huntington's Disease RNA Therapy
Source: Front Neurosci. 2017 Oct 10;11:544. doi: 10.3389/fnins.2017.00544 (PMC5641306; doi:10.3389/fnins.2017.00544)
Supplement: Supplementary file 4 [file Table1.XLSX]

## Sheet: Sheet1
		Sequence (5' -> 3')
	Tether 4	TCCACTTAGTTCTACACCTCATTCATTCATTCAGTGAGTGTTTCTCGACTACTATGAATAAACCGTTATACTCCATGTTGCGGGCAGAATGGGGATCTGG
	Tether 7	CCGGGGGTTCGTGTCGCCGGCCCGCAGGCTGCAGGGTTACCGCCATCCCCGCCGTAGCCTGGGACCCGCCGGGACAGGGAGCTGCAGCGGGCCCAAACTC
	Tether 8	GTCGCCGGCCCGCAGGCTGCAGGGTTACCGCCATCCCCGCCGTAGCCTGGGACCCGCCGGGACAGGGAGCTGCAGCGGGCCCAAACTCACGGTCGGTGCA
	Tether 9	ATATGTGTTGAATTACCCACTCCACTTAGTTCTACACCTCATTCATTCATTCAGTGAGTGTTTCTCGACTACTATGAATAAACCGTTATACTCCATGTTG
	Tether 11	CGCGTTTCTCGACTACTATGAATAAACCGTTATACTCCATGTTGCGGGCAGAATGGGGATCTGGACAGGGAAGCACAGGGCACGAGTTCACCAATGGCTGTCAA
	GAPDH fw	TCCGCGCAGCCGAGCCA
	GAPDH rev	ACGCCAGTGGACTCCACG
	F1 (mini-gene-specific)	GCAGAAGTTGGTCGTGAGGC
	F2 (PTM-specific)	CCGGCCATCTAGGCCAAGC
	R1	CACACGGTCTTTCTTGGTAGCTG
	R2	CTGACAGACTGTGCCACTATG
	R3	ACTCTGCGTCATCACTGCACAGC
	R4	AGGCATTCGTCAGCCACCATCC
	R5	GATAACTTTGTTGAGGCATTCG
	Ex1.1 (PTM specific)	CTGCTGGAAGGACTTGAGGG
	Ex1.2 (PTM specific)	GGCGGCTGAGGAAGCTGAGGA
	HD53	GGTTCTGCTTTTACCTGCGGC
