# Supplementary material for: Optimization of trans-Splicing for Huntington's Disease RNA Therapy
Source: Front Neurosci. 2017 Oct 10;11:544. doi: 10.3389/fnins.2017.00544 (PMC5641306; doi:10.3389/fnins.2017.00544)
Supplement: Supplementary file 5 [file Table2.XLSX]

## Sheet: Sheet1
		Supplementary Table 2. Trans-splicing as a therapeutic agent in genetic disorders
		Genetic disorder	Reference(s)
		Cystic Fibrosis	Liu et al., 2002, Mansfield et al., 2000, Mansfield et al., 2003
		Duchenne muscular dystrophy	Lorain et al., 2008, Lorain et al., 2013
		Dysferlinopathies / Titinopathies	Monjaret et al., 2014
		Dystrophia Mytonoica Type 1	Chen et al., 2009
		Epidermolysis Bullosa	Wally et al., 2010, Wally et al., 2008, Murauer et al., 2011
		Hemophilia A	Chao et al., 2003
		Huntington's Disease	Rindt et al., 2012
		Retinitis Pigmentosa	Berger et al., 2016
		Severe Combined Immune Deficiency	Zayed et al., 2007
		Spinal Muscular Atrophy	Coady et al., 2007, Coady et al., 2008, Coady and Lorson, 2010, Shababi et al., 2011, Shababi and Lorson, 2012
		X-linked Immunodeficiency with hyper-IgM	Tahara et al., 2004
